RESEARCH ARTICLE

# Exposure to substance and current substance among school-going adolescents in Timor-Leste

Abigail Esinam Adade<sup>1</sup>, Kenneth Owusu Ansah<sup>1,2\*</sup>, Nutifafa Eugene Yaw Dey<sup>1</sup>, Francis Arthur-Holmes<sup>3</sup>, Henry Ofori Duah<sup>4</sup>, Agbadi Pascal<sup>3</sup>

**1** Department of Psychology, University of Ghana, Legon, Ghana, **2** Department of Psychiatry, Komfo Anokye Teaching Hospital, Kumasi, Ghana, **3** Department of Sociology and Social Policy, Lingnan University, Tuen Mun, Hong Kong, **4** Research Department, FOCOS Orthopaedic Hospital, Accra, Ghana

\* [kinetic55@hotmail.com](mailto:kinetic55@hotmail.com)

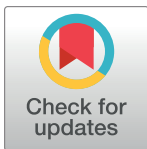

## Abstract

Few studies have examined how exposure to substance influences adolescent's use of substance in Timor-Leste. We assessed this relationship using nationally representative data from Timor-Leste to address this gap. Data was pulled from the 2015 Timor-Leste Global school-based student health survey. Data of students aged 13–17 years ( $N = 3700$ ) from class 7–11 across schools in Timor-Leste were analyzed for this study. Second-hand smoking exposure (AOR = 1.57 [1.31, 1.89] and parental tobacco use, AOR = 1.94 [1.54, 2.44]) was significantly related to in-school adolescent's current use of substance after adjusting for covariates. Current substance use was also positively associated with being male, being in class 10–12, and being food insecure and negatively associated with having at least three close friends and benefiting from parental supervision. To reduce substance use among in-school adolescents, policymakers must consider the inclusion of all models in the social learning environment of adolescents in Timor-Leste.

## OPEN ACCESS

**Citation:** Adade AE, Owusu Ansah K, Dey NEY, Arthur-Holmes F, Duah HO, Pascal A (2022) Exposure to substance and current substance among school-going adolescents in Timor-Leste. *PLOS Glob Public Health* 2(8): e0000797. <https://doi.org/10.1371/journal.pgph.0000797>

**Editor:** Nnodimele Onuigbo Atulomah, Babcock University, NIGERIA

**Received:** September 9, 2021

**Accepted:** July 6, 2022

**Published:** August 4, 2022

**Peer Review History:** PLOS recognizes the benefits of transparency in the peer review process; therefore, we enable the publication of all of the content of peer review and author responses alongside final, published articles. The editorial history of this article is available here: <https://doi.org/10.1371/journal.pgph.0000797>

**Copyright:** © 2022 Adade et al. This is an open access article distributed under the terms of the [Creative Commons Attribution License](https://creativecommons.org/licenses/by/4.0/), which permits unrestricted use, distribution, and reproduction in any medium, provided the original author and source are credited.

**Data Availability Statement:** The dataset used in this study is freely available and accessible to the public on the WHO website at [https://www.cdc.gov/gshs/countries/seasian/timor\\_leste.htm](https://www.cdc.gov/gshs/countries/seasian/timor_leste.htm).

## 1 Introduction

Substance use remains a crisis affecting both adults and adolescents [1]. The burden of substance use is more severe among adolescents because they are at a higher risk of using and experimenting with a variety of psychoactive substances [2, 3]. Adolescents commonly use cannabis, alcohol, and tobacco [4]. Globally, about 13.8 million youths (5.6% of school-going adolescents) have used cannabis [5]. It is estimated that adolescents averagely consume six litres of pure alcohol consumption per year [6]. Recent data report that nine out of ten tobacco smokers started before the age of eighteen, and 24 million of these early smokers were 13–15 years old [7]. The prevalence of current substance use among adolescents in Timor-Leste is equally worrying. Prevalence results from school-based studies indicate cigarettes and/or tobacco usage of 29.7% [8], alcohol usage of 12.5% [9], and 5.4% usage of cannabis [10].

Alleviating adolescents' regular use of one or multiple types of substances is a central feature of international and national public health policy to reduce the ravaging effects of substance use on the social, emotional, and cognitive development of adolescents [11, 12]. Substance use

**Funding:** The authors received no specific funding for this work.

**Competing interests:** The authors declare that they have no conflict of interest.

among adolescents is associated with a myriad of debilitating consequences such as poor academic performance and engagement in societal vices [13], respiratory illness and cardiovascular disease [14], anxiety, depression, personality disorders, and suicidal tendencies [15]. Reliance on substances equally impair cognitive abilities such as memory, attention, verbal ability, and intelligence have also been reported [16]. In the worst scenario, using substances leads to death. From 1999 to 2015, the death rate due to drug overdose among adolescents has more than doubled in 2015 [17].

Due to these high prevalence rates and the damaging effects of substance use, many stakeholders including the government of Timor-Leste have invested in reducing the proliferation and usage of substances. The WHO and the United Nations in collaboration with the Timor-Leste government have spearheaded the amalgamation and development of recommendations and mechanisms to tackle substance use [18]. This collaboration, which began in 2011, resulted in the crafting of policies such as the display of the health effects of tobacco use on the most visible surfaces of tobacco packages [18]. Despite such measures, the usage of substances, particularly amongst adolescents is on the surge. While it has become imperative for the government of Timor-Leste to introduce more adequate and strict national laws and policies for controlling access to substances by adolescents [19], evidence from recent research examining factors that maintain and raise the prevalence rates of substance usage in adolescence is greatly needed to supplement these laws and policies [20].

Earlier studies from Timor-Leste have identified peer pressure and cigarette marketing activities [21], poor parental supervision and poverty [8], exposure to cigarette advertisements and promotions, parental smoking, close friends smoking and the amount of pocket money [22] as contributors to adolescent substance use. However, recent studies on exposure to substances and substance use amongst Timor-Leste adolescents are lacking. Although Siziya et al. [22] identified exposure factors such as parental smoking and having close friends that smokes as contributors to adolescent substance use; the authors relied on the 2006 Global Youth Tobacco Survey. Again, these authors focused exclusively on adolescents in grades 7–9 and on cigarette, without examining adolescents in upper secondary grade (grades 9–12) as well as other substances like marijuana, alcohol, and tobacco. Considering these limitations, the most recent Timor-Leste Global school-based student health survey from 2015 was used to confirm whether exposure to substance still has an influence on adolescent's substance use.

We situated our hypothesis within Albert Bandura's social learning theory [23] and Ajzen's theory of planned behaviour [24]. Bandura hypothesised that there are both models and learners in every social learning environment. In this social learning context, learners intentionally or unconsciously observe and imitate behaviours from their models [23]. Bandura further emphasized people's behaviours are driven by purposes and goals that are fuelled by their personal beliefs of self-efficacy and goal expectations from their behaviours in a specific social environment [23]. Self-efficacy which is one of the cardinal factors Bandura identified, primarily influences individuals' self-regulation and expected outcomes. When an individual, thus, has a high belief of having the required capability of executing a behaviour successfully, there is a high likelihood the individual will be goal-directed [23]. Similar to Bandura's assertion, Ajzen theory of planned behaviour emphasized that people make logical and reasoned decisions to execute a particular behaviour by evaluating the kind of information available to them [24]. According to Ajzen, behavioural achievement is based on the person's intentions to engage in the behaviour. These intentions are typically influenced by the value the person places on the behaviour, perceived societal pressure, the ease at which the person can perform the behaviour, the views of significant others as well as opportunities available that may help or hinder the behaviour [24]. The decision of an adolescent to engage in a behaviour, such as the intentional use of illicit drugs is predicted by these factors. Overall, both theories emphasize

how personal dispositions such as self-efficacy, influences an individual's attempt to execute a behaviour.

In our study, adults and parents are the models, in-school adolescents are the learners, and substance use is the behaviour. Given that children grow up under the nurture and upbringing of parents in a microenvironment, adolescents can easily learn both positive and negative behaviours from their parents when they have the strong belief that they have a mastery of executing such behaviours [25]. Also, children grow up in communities outside the primary environment of the home where they equally can learn beneficial or harmful behaviours. Most of these adolescents who observe their parents and significant others learn both the positive and the negative behaviours because they perceive that such behaviours are acceptable among their parents and significant others. Studies conducted elsewhere have credited the social learning theory and theory of planned behaviour as one of the ways to understand the link between exposure and adolescent substance use [26–28]. Both theories also intimated the idea that learners may be vulnerable, and this vulnerability can make them adopt unhealthy behaviours. Generally, it is believed that the period of adolescence is marked by sensation seeking and the vulnerability of engaging in risky activities [29, 30]. This vulnerable period due to high sense of self-efficacy and sensation seeking disposition, makes it difficult for adolescents to resist practicing observed smoking behaviours of their parents, peers, and others in their learning environment [31]. Against this backdrop, we aimed to understand the relationship between in-school adolescents' current substance use and exposure to models that use substances.

## 2 Methods

### 2.1 Study design

This study used a cross-sectional secondary dataset involving the 2015 Timor-Leste Global school-based student health survey (GSHS) [7]. The GSHS was created by the World Health Organization (WHO) in 2003 in collaboration with the United Nations' UNICEF, UNESCO, and UNAIDS, receiving technical support from the Centre for Disease Control and Prevention (CDC). The GSHS is a global school-based survey conducted primarily among a nationally representative student sample aged 13–17 years from low-and-middle-income countries [7]. The survey captures data on an extensive variety of variables measured with valid and standardized instruments [7]. These variables include demographics, alcohol and drug use, sexual behaviours that contribute to HIV infection, sexually transmitted infections, unintended pregnancy, tobacco use, violence and unintentional injury, dietary behaviours, hygiene, mental health, and physical activity.

### 2.2 Study sample and sample size

Three-thousand-seven-hundred-and-four (3,704) students participated and completed the Timor-Leste GSHS. These students comprised those who were in Class 7–11 and aged 13–17. Data collection was conducted with a computer scannable answer sheet which was distributed by trained staff during one standard class period. For the sampling technique, the GSHS utilized a two-stage cluster sample design with the mission to generate representative data of all students in Class 7–11. The initial stages of data collection consisted of the selection of schools that reflected the probability proportion of the entire enrolment size in the country. As a result of this school selection process, 38 schools were randomly sampled. At the second stage, classes of the sampled schools were randomly chosen with random start and all students in these classes were eligible to participate. About 4691 students were eligible for data collection. The data collection produced a 100% school response rate, 79% student response, and 79% overall data collection response rate.

Data of 3700 students were used for this study.

## 2.3 Measures

**2.3.1 Outcome variable.** Adolescent current substance use was treated as the outcome variable in this study. This variable was created by combining four single-item questions measuring students current use of specific substances including cigarettes, marijuana, alcohol, and tobacco. Combination of the four single-item into one variable was based on a similar approach by Moilanen et al. [32]. These set of questions can be found in Table 1. We created our current substance use variable out of the GSHS binary generated versions of these four questions [7]. These GSHS binary variables have a response format of “Yes = 1” and “No = 0” and we kept this response for our newly generated variable.

### 2.3.2 Predictor variable

The predictor variable for this study was exposure to substance. It was conceptualized from two variables namely people smoking in child’s presence or second-hand smoking exposure

**Table 1. Weighted socio-demographic characteristics of the of the students.**

| Variable                        | Frequency (%) | Survey questions, GSHS generated binary and coding                                                                                                                                     |
|---------------------------------|---------------|----------------------------------------------------------------------------------------------------------------------------------------------------------------------------------------|
| <b>Current substance use</b>    |               | During the past 30 days, on how many days did you have at least one drink containing alcohol?                                                                                          |
| (0) No                          | 2394 (63.57)  | (0) 0 days                                                                                                                                                                             |
| (1) Yes                         | 1306 (36.43)  | (1) 1 or 2 days/1 to 2 days/3 to 5 days/6 to 9 days/10 to 19 days/20 to 29 days/All 30 days                                                                                            |
| Total                           | 3700 (100)    | During the past 30 days, on how many days did you smoke cigarettes?                                                                                                                    |
|                                 |               | (0) 0 days                                                                                                                                                                             |
|                                 |               | (1) 1 or 2 days/1 to 2 days/3 to 5 days/6 to 9 days/10 to 19 days/20 to 29 days/All 30 days                                                                                            |
|                                 |               | During the past 30 days, how many times have you used marijuana (also called Ganja)?                                                                                                   |
|                                 |               | (0) 0 days                                                                                                                                                                             |
|                                 |               | (1) 1 or 2times/3 to 9times/10 to 19times/20 or more times                                                                                                                             |
|                                 |               | During the past 30 days, on how many days did you use any tobacco products other than cigarettes, such as Joker, LA, Gudang garam, Sigaru 23, Surya, snuff, chewing tobacco, or betel? |
|                                 |               | (0) 0 days                                                                                                                                                                             |
|                                 |               | (1) 1 or 2 days/1 to 2 days/3 to 5 days/6 to 9 days/10 to 19 days/20 to 29 days/All 30 days                                                                                            |
| <b>People smoke in presence</b> |               | During the past 7 days, on how many days have people smoked in your presence?                                                                                                          |
| No                              | 798 (20.27)   | (2) 0 days                                                                                                                                                                             |
| Yes                             | 2858 (79.73)  | (1) 1 or 2 days/3 or 4 days/5 to 6 days/All 7 days                                                                                                                                     |
| Total                           | 3656 (100)    |                                                                                                                                                                                        |
| <b>Parental Tobacco Use</b>     |               | Which of your parents or guardians use any form of tobacco?                                                                                                                            |
| No                              | 2432 (67.64)  | (2) Neither/I do not know                                                                                                                                                              |
| Yes                             | 1186 (32.36)  | (1) My father or male guardian/My mother or female guardian/both                                                                                                                       |
| Total                           | 3618 (100)    |                                                                                                                                                                                        |
| <b>Age</b>                      |               | How old are you?                                                                                                                                                                       |
| 11-15yrs                        | 1758 (40.63)  | (0) 11years old or younger-15years old                                                                                                                                                 |

(Continued)

Table 1. (Continued)

| Variable                      | Frequency (%) | Survey questions, GSHS generated binary and coding                                                                    |
|-------------------------------|---------------|-----------------------------------------------------------------------------------------------------------------------|
| 16years and above             | 1872 (59.37)  | (1) 16years old -18 years old or older                                                                                |
| Total                         | 3630 (100)    |                                                                                                                       |
| <b>Gender</b>                 |               | What is your sex?                                                                                                     |
| Male                          | 1625 (50.68)  | (1) Male                                                                                                              |
| Female                        | 1877 (49.32)  | (2) Female                                                                                                            |
| Total                         | 3502 (100)    |                                                                                                                       |
| <b>Grade in school</b>        |               | In what grade are you?                                                                                                |
| Class 7–9 lower secondary     | 2441 (60.19)  | (0) Class 7 (EBC. 3 Ciclo)/Class 8 (EBC. 3 Ciclo)/Class 9 (EBC. 3 Ciclo)                                              |
| Class 10–12 upper secondary   | 1155 (39.81)  | (1) Class 10 (ES)/Class 11 (ES)/Class 12 (ES)                                                                         |
| Total                         | 3596 (100)    |                                                                                                                       |
| <b>Food insecurity</b>        |               | During the past 30 days, how often did you go hungry because there was not enough food in your home?                  |
| Secure                        | 3215 (88.27)  | (1) Most of the time/Always                                                                                           |
| Insecure                      | 429 (11.73)   | (0) Never/Rarely/Sometimes                                                                                            |
| Total                         | 3644 (100)    |                                                                                                                       |
| <b>Number close friends</b>   |               | How many close friends do you have?                                                                                   |
| 0                             | 172 (4.76)    | (1) 0                                                                                                                 |
| 1                             | 374 (9.70)    | (2) 1                                                                                                                 |
| 2                             | 574 (14.63)   | (3) 2                                                                                                                 |
| 3+                            | 2496 (70.91)  | (0) 3 or more                                                                                                         |
| Total                         | 3616 (100)    |                                                                                                                       |
| <b>Colleague support</b>      |               | During the past 30 days, how often were most of the students in your school kind and helpful?                         |
| No                            | 2607 (72.27)  | (0) Never/Rarely/Sometimes                                                                                            |
| Yes                           | 960 (27.73)   | (1) Most of the time/Always                                                                                           |
| Total                         | 3567 (100)    |                                                                                                                       |
| <b>Parental supervision</b>   |               | During the past 30 days, how often did your parents or guardians check to see if your homework was done?              |
| No                            | 2607 (71.49)  | (0) Never/Rarely/Sometimes                                                                                            |
| Yes                           | 1022 (28.51)  | (1) Most of the time/Always                                                                                           |
| Total                         | 3629 (100)    |                                                                                                                       |
| <b>Parental connectedness</b> |               | During the past 30 days, how often did your parents or guardians understand your problems and worries?                |
| No                            | 3219 (88.10)  | (0) Never/Rarely/Sometimes                                                                                            |
| Yes                           | 407 (11.90)   | (1) Most of the time/Always                                                                                           |
| Total                         | 3626 (100)    |                                                                                                                       |
| <b>Parental bonding</b>       |               | During the past 30 days, how often did your parents or guardians really know what you were doing with your free time? |
| No                            | 2773 (76.43)  | (0) Never/Rarely/Sometimes                                                                                            |
| Yes                           | 23.57 (23.57) | (1) Most of the time/Always                                                                                           |
| Total                         | 3580 (100)    |                                                                                                                       |
| <b>Parental respect</b>       |               | During the past 30 days, how often did your parents or guardians go through your things without your approval?        |
| No                            | 957 (27.81)   | (0) Most of the time/Always                                                                                           |
| Yes                           | 2646 (72.19)  | (1) Never/Rarely/Sometimes                                                                                            |
| Total                         | 3603 (100)    |                                                                                                                       |

<https://doi.org/10.1371/journal.pgph.0000797.t001>

(X1) and parental use of tobacco (X2). Both variables were measured using a single-item question. For X1 the question, “During the past 7 days, on how many days have people smoked in your presence?” was used. Students responded to this question on a 5-point response scale namely, “0 days”, “1 or 2days”, “3 or 4days”, “5 to 6days” and “All 7days”. For X2 the question, “Which of your parents or guardians use any form of tobacco?” was used. Students responded to this question also on a 5-point response scale namely “Neither”, “My father or male guardian”, “My mother or female guardian”, “Both” and “I do not know”. A binary version of these questions was generated by GSHS to capture the percentage of participants who were exposed and those not bearing a “Yes” (1) and “No” (0) response. We used this binary variable in our analyses.

**2.3.3 Control variables.** Our selection of control variables was motivated by their availability in the dataset and based on evidence from previous school-based research [33, 34]. The control variables are this: Gender, age, grade in school, number of friends, colleague support, food insecurity and parental involvement were the variables selected. More details about the control variables, their respective survey questions and the coding used are presented in Table 1.

## 2.4 Ethics and data accessibility

The World Health Organization’s Ethical Committee alongside ministries of education and/or health in each participating country granted ethical approval for the survey. Before the data collection procedure, the enumerators obtained child assent and parental/adult consent. The dataset used in this study is fully anonymized and freely available and accessible to the public on the WHO website at [https://www.cdc.gov/gshs/countries/seasian/timor\\_leste.htm](https://www.cdc.gov/gshs/countries/seasian/timor_leste.htm).

## 2.5 Data preparation and analysis

Data analyses began in Stata version 14 by cleaning the data and recoding the variables of interest. We entered the “svyset” command adjusting for clusters, stratification, and sample weights, all performed to account for the complex sampling design contained in the dataset. This procedure is recommended to control for potential analytic errors and allow proper inferences from the data [35]. Univariate analysis was subsequently performed generating frequencies and percentages of the study variables. We next conducted Chi-square test to examine the bivariate relationship between the study variables. We moved on next to conducting multivariable analyses in logistic regression by entering the “logistic” command. Four models of logistic regression analyses were conducted to examine the objective of this study. The first one examined the relationship between people smoke in presence (X1) and adolescent current substance use (Y). The second model examined the relationship between parental Tobacco Use (X2) and Y. Third model predicted X1, X2 onto Y. The last model examined the relationship between X1, X2, Y while controlling for covariates. In all these analyses both crude and adjusted odd ratios were reported.

## 3 Results

### 3.1 Socio-demographic characteristics of students

The prevalence of adolescent current substance use was 36.43% [95% CI:33.2, 39.78]. About 79.73% of the school-going adolescents reported people smoked in their presence and 32.36% reported their parents use some form of tobacco. Greater number of students (59.37%) were aged 16+ years. The sex percentage rate of students was 50.68% males and 49.32% females. About 60.19% were in Class 7–9 while 39.81% were in Class 10–12. Adolescents from food



insecure households were approximately 11.77%. Only 4.76% of the students had no close friends. About 27.73% of the students reported having colleague support. In terms of parental involvement, 28.51% of parents assisted their children to complete their homework. About 11.90% of parents understood the problems their children were experiencing and 23.57% had knowledge about where their children spent their free time. About 72.19% of the parents go through their child's things without any approval from the child. See summary of results on [Table 1](#).

### 3.2 Bivariate analysis examining the link between smoking in the presence of adolescents, parental tobacco use, adolescent current substance use substance use and covariates

We performed bivariate analyses with Chi-square test of independence to examine the relationship between people who smoke in the presence of adolescents, parental tobacco use, adolescent substance use and covariates. The results revealed that smoking in the presence of adolescents and parental substance tobacco use were both significantly related to adolescent current substance use. Thus, 38.14% of students who reported people smoke in their presence, also engaged in substance use. Also, 46.67% of the students with parents who smoke tobacco are currently using substance. We further found significant relationships between the covariates and adolescent current substance use which is summarized in [Table 2](#).

### 3.3 Multivariable logistic regression

[Table 3](#) contains the results of logistic regression estimating the association between smoking in the presence of the adolescent and parental tobacco use on adolescent substance use. In Model 1, it was noted that adolescents who were in the presence of those who smoked were more likely to engage in substance use than students who were not in the presence of those who smoked [OR = 1.59, 95% CI: 1.30, 1.94]. In Model 2, it was observed that students with parents who use tobacco were more likely to engage in substance use than those with parents who do not use tobacco [OR = 1.95, 95% CI: 1.53, 2.48]. In Model 3, when both predictors were included, people who smoked in the presence of others were associated with greater odds of adolescent substance use [OR = 1.60, 95% CI: 1.33, 1.93]. It was further noted that, parental tobacco use was associated with greater odds of adolescent substance use [OR = 1.93, 95% CI: 1.51, 2.48]. In Model 4, after adjusting for covariates (gender, age, grade, close friends, colleague support, food insecurity, parental supervision, parental connectedness, parental bonding, and parental respect), both predictor variables remained associated with current substance use. These findings are consistent with our hypotheses that parental substance use and people smoking in the presence of the adolescent, increases the likelihood of adolescent substance use. It was also noted in Model 4 that male students were more likely to engage in substance use than female students. Students in the upper secondary (Class 10 to 12) were more likely to engage in substance use than students in the lower secondary (Class 7 to 9). Students with 3 or more friends were less likely to engage in substance use than students with no friends. Students who were food insecure were more likely to be currently using substance than students who were food secure. Students who experienced parental supervision were less likely to engage in substance use than students who experience no parental supervision.

## 4 Discussion

This study used the 2015 Timor-Leste Global School-based Student Health Survey to examine exposure to substance and substance usage among school-going adolescents. Over 36% of

Table 2. Chi-Square examining the relationship between adolescent' substance use, independent variables and covariates.

| Variables                       | Substance use |               | Statistics                  |
|---------------------------------|---------------|---------------|-----------------------------|
|                                 | <i>n</i> (%)  | <i>n</i> (%)  |                             |
|                                 | Yes           | No            |                             |
| <b>People smoke in presence</b> |               |               | $\chi^2 = 26.64, p = .0001$ |
| No                              | 221 (27.94%)  | 577 (72.06%)  |                             |
| Yes                             | 1053 (38.14%) | 1803 (61.86%) |                             |
| <b>Parental tobacco use</b>     |               |               | $\chi^2 = 83.95, p = .000$  |
| No                              | 703 (31.03%)  | 1729 (68.97%) |                             |
| Yes                             | 556 (46.67%)  | 629 (53.33%)  |                             |
| <b>Age</b>                      |               |               | $\chi^2 = 42.66, p = .0019$ |
| 11–15                           | 520 (30.01%)  | 1235 (69.99%) |                             |
| 16+                             | 752 (40.63%)  | 1119 (59.37%) |                             |
| <b>Gender</b>                   |               |               | $\chi^2 = 322.13, p = .000$ |
| Female                          | 412 (21.12%)  | 1464 (78.88%) |                             |
| Male                            | 803 (50.23%)  | 820 (49.77%)  |                             |
| <b>Grade in School</b>          |               |               | $\chi^2 = 37.61, p = .0007$ |
| Class 7–9                       | 778 (32.13%)  | 1662 (67.87%) |                             |
| Class 10–12                     | 478 (42.17%)  | 675 (57.83%)  |                             |
| <b>No. of close friends</b>     |               |               | $\chi^2 = 5.94, p = .0802$  |
| 0                               | 78 (44.38%)   | 93 (55.62%)   |                             |
| 1                               | 147 (39.50%)  | 226 (60.50%)  |                             |
| 2                               | 185 (33.13%)  | 389 (66.87%)  |                             |
| 3 or more                       | 836 (35.09%)  | 1658 (64.91%) |                             |
| <b>Colleague support</b>        |               |               | $\chi^2 = .36, p = .5825$   |
| No                              | 905 (35.95%)  | 1701 (64.05%) |                             |
| Yes                             | 326 (34.88%)  | 633 (65.12%)  |                             |
| <b>Food insecurity</b>          |               |               | $\chi^2 = 24.93, p = .0018$ |
| Secure                          | 1084 (34.91%) | 2129 (65.09%) |                             |
| Insecure                        | 198 (47.28%)  | 230 (52.72%)  |                             |
| <b>Parental supervision</b>     |               |               | $\chi^2 = 5.43, p = .0164$  |
| No                              | 935 (36.96%)  | 1671 (63.04%) |                             |
| Yes                             | 321 (32.85%)  | 700 (67.15%)  |                             |
| <b>Parental connectedness</b>   |               |               | $\chi^2 = 2.55, p = .2830$  |
| No                              | 1092 (35.38%) | 2126 (64.62%) |                             |
| Yes                             | 164 (39.30%)  | 243 (60.70%)  |                             |
| <b>Parental bonding</b>         |               |               | $\chi^2 = 2.33, p = .3092$  |
| No                              | 930 (35.27%)  | 1842 (64.73%) |                             |
| Yes                             | 311 (38.15%)  | 496 (61.85%)  |                             |
| <b>Parental respect</b>         |               |               | $\chi^2 = 14.94, p = .0258$ |
| No                              | 394 (41.13%)  | 563 (58.87%)  |                             |
| Yes                             | 863 (34.22%)  | 1781 (65.78%) |                             |

<https://doi.org/10.1371/journal.pgph.0000797.t002>

school-going adolescents use alcohol, tobacco, cigarette or marijuana which is consistent with research that found 38% of poly substance use among school-going adolescents [36].

Exposure to substance (being in the presence of smokers or second-hand smoking and parental use of tobacco) was positively related to in-school adolescent's current substance usage. Bandura's social learning theory argues that through exposure and observation, people learn and model others' behaviours [23]. Adolescents in Timor-Leste may have appraised the



Table 3. Summary of logistic regression examining the relationship between exposure to substance and usage of substance amongst school-going adolescents.

|                                 | Model 1              | Model 2              | Model 3              | Model 4              |
|---------------------------------|----------------------|----------------------|----------------------|----------------------|
| Variables                       | OR [95% CI]          | OR [95% CI]          | AOR [95% CI]         | AOR [95% CI]         |
| <b>People smoke in presence</b> |                      |                      |                      |                      |
| No                              | 1 [ref]              |                      | 1 [ref]              | 1 [ref]              |
| Yes                             | 1.59*** [1.30, 1.94] |                      | 1.60*** [1.33, 1.93] | 1.57*** [1.31, 1.89] |
| <b>Parental tobacco use</b>     |                      |                      |                      |                      |
| No                              |                      | 1 [ref]              | 1 [ref]              | 1 [ref]              |
| Yes                             |                      | 1.95*** [1.53, 2.48] | 1.93*** [1.51, 2.48] | 1.94*** [1.54, 2.44] |
| <b>Age</b>                      |                      |                      |                      |                      |
| 11–15                           |                      |                      |                      | 1 [ref]              |
| 16+                             |                      |                      |                      | 1.30 [0.92, 1.82]    |
| <b>Gender</b>                   |                      |                      |                      |                      |
| Female                          |                      |                      |                      | 1 [ref]              |
| Male                            |                      |                      |                      | 4.13*** [3.16, 5.40] |
| <b>Grade in School</b>          |                      |                      |                      |                      |
| Class 7–9                       |                      |                      |                      | 1 [ref]              |
| Class 10–12                     |                      |                      |                      | 1.60** [1.23, 2.09]  |
| <b>No. of close friends</b>     |                      |                      |                      |                      |
| 0                               |                      |                      |                      | 1 [ref]              |
| 1                               |                      |                      |                      | 0.74 [0.44, 1.25]    |
| 2                               |                      |                      |                      | 0.58 [0.33, 1.02]    |
| 3 or more                       |                      |                      |                      | 0.59* [0.35, 0.98]   |
| <b>Colleague support</b>        |                      |                      |                      |                      |
| No                              |                      |                      |                      | 1 [ref]              |
| Yes                             |                      |                      |                      | 1.00 [0.82, 1.22]    |
| <b>Food insecurity</b>          |                      |                      |                      |                      |
| Secure                          |                      |                      |                      | 1 [ref]              |
| Insecure                        |                      |                      |                      | 1.55* [1.09, 2.20]   |
| <b>Parental supervision</b>     |                      |                      |                      |                      |
| No                              |                      |                      |                      | 1 [ref]              |
| Yes                             |                      |                      |                      | 0.76** [0.66, 0.89]  |
| <b>Parental connectedness</b>   |                      |                      |                      |                      |
| No                              |                      |                      |                      | 1 [ref]              |
| Yes                             |                      |                      |                      | 1.00 [0.67, 1.50]    |
| <b>Parental bonding</b>         |                      |                      |                      |                      |
| No                              |                      |                      |                      | 1 [ref]              |
| Yes                             |                      |                      |                      | 1.10 [0.85, 1.41]    |
| <b>Parental respect</b>         |                      |                      |                      |                      |
| No                              |                      |                      |                      | 1 [ref]              |
| Yes                             |                      |                      |                      | 0.82 [0.59, 1.15]    |
| <b>More details</b>             |                      |                      |                      |                      |
| Number of strata                | 19                   | 19                   | 19                   | 19                   |
| Number of PSUs                  | 38                   | 38                   | 38                   | 38                   |
| Design <i>df</i>                | 19                   | 19                   | 19                   | 19                   |
| F value                         | $F(1, 19) = 23.37$   | $F(1, 19) = 33.39$   | $F(2, 18) = 37.36$   | $F(14, 6) = 20.12$   |
| Prob > F                        | 0.0001               | 0.0000               | 0.0000               | 0.0007               |
| N                               | 3654                 | 3617                 | 3588                 | 3,040                |
| Population size                 | 84,473.14            | 83,774.846           | 83,098.112           | 70,383.891           |

(Continued)

Table 3. (Continued)

|                              | Model 1     | Model 2     | Model 3      | Model 4      |
|------------------------------|-------------|-------------|--------------|--------------|
| Variables                    | OR [95% CI] | OR [95% CI] | AOR [95% CI] | AOR [95% CI] |
| McKelvey and Zavoina's $R^2$ | 0.196       | 0.406       | 0.483        | 0.853        |

Note. CI: 95% confidence intervals

\*  $p < 0.05$

\*\*  $p < 0.01$

\*\*\*  $p < 0.001$

<https://doi.org/10.1371/journal.pgph.0000797.t003>

smoking behaviours around them as favourable [37], something worth trying, and modelled these behaviours. This series of learning processes could have increased susceptibility to initiate smoking and develop the behaviour of substance use. This is consistent with earlier studies suggesting that adolescent's uptake of tobacco smoking was substantially increased by second-hand smoking exposure [22, 38, 39]. The influence of second-hand smoking exposure is even greater when the child is surrounded by multiple smokers including parents, grandparents, older siblings or other people living outside the household [40, 41]. Such levels of exposure to nicotine activates neural pathways that increase the sensitivity of the brain to nicotine and promote the urge to smoke and try out other substances [42]. Our results are further supported and explained by similar studies conducted elsewhere [33, 43]. For instance, Jawad et al. [43] found that that youth waterpipe smoking was significantly influenced by parental tobacco use. In a nutshell, the involvement of one or both parents as smokers have a major effect on adolescents' development of tobacco use behaviours, leading to the intergenerational transmission of smoking behaviours within families [44, 45]. Furthermore, the theory of planned behaviour asserts individuals are more likely to engage in a particular health behaviour if they believe the behaviour will result in specific outcomes that are value. Nicotine, like other drugs, activates reward pathways in the brain-circuitry that regulates reinforcement and pleasurable feelings [46]. Adolescents seek sensation and value pleasure (28). As a result, the pleasurable effects of substances such as nicotine contribute to adolescent substance abuse. In addition, due to the highly addictive properties of nicotine, it is more likely that these exposed adolescents may begin to experiment with other substances and increasing their vulnerability of becoming illicit substance consumers for life [47].

Males were more likely to use substance than females. The variation in use between adolescent males and females in Timor-Leste may be due to biological and social or intrinsic factors. Biologically, males and females exhibit differences in sexual dimorphisms in the brain, endocrine (e.g., ovarian hormones), and metabolic processes, all of which play a significant role in the use and abuse of substance [48]. The consensus in the literature is that males have lesser intoxication rate of alcohol and other substances compared to females due to higher substance related metabolism [48]. As a result, males can consume more substances than their female counterparts. Typical traditional masculine norms expressed through aggression, dominance and risk taking [49] as well as intrinsic factors like high novelty seeking or impulsivity personalities [50, 51] further put males ahead of females in the utilization of substance. All these factors may account for the differences in substance use between boys and girls in Timor-Leste. Our result is consistent with findings among school-going adolescents in Morocco [2, 52], South East Asian countries [53] and Pacific Island countries [34]. Our findings also run parallel with a study by Lev-Ran et al. [54] who revealed a high prevalence of psychoactive drugs (i.e., alcohol, sedatives, cannabis, tranquilizers, opioids, hallucinogens, and cocaine) usage and abuse in men.

Adolescents in upper secondary grade were more likely to currently use substances than those in lower secondary grade. Perhaps adolescents in upper grade may be using substance to cope with the increasing stressors typically associated with upper grade levels [55]. Some of these reported stressors amongst seniors include pressure from studying, academic workload, self-expectation stress and study despondency [56]. Also, upper secondary grade is associated with greater peer control [57]. Due to this great influence, adolescents in upper grades who find themselves in peer groups that use, or abuse substances may be compelled through the sense of group conformity to also use [58]. This is consistent with previous literature indicating high substance usage amongst adolescents in higher grades [52, 59, 60].

Adolescents who were food insecure were more likely to use substance. Food insecurity is the limited or uncertain availability of nutritionally adequate safe food or the inability to purchase food in a socially acceptable manner [61]. Evidence suggests that Timor-Leste is a food insecure country with about 36% of households experiencing chronic levels of food insecurity [62]. Given this high chronic prevalence and the 11.73% prevalence found in our study, there is an urgent need for solving food insecurity crisis in Timor-Leste. Nevertheless, it is possible that adolescents who are food insecure are using substance in a way to cope with their situation. A survey among adolescent street children revealed that they use psychoactive substances to alleviate hunger and anxiety as well as stimulants and opioids to suppress their appetite [63]. Likewise, food insecure adolescents may be using multiple substances, which are often more accessible, to alleviate their feelings of hunger. Our finding is consistent with previous studies. One study demonstrated in an urban youth population survey that food insecurity correlates positively with substance use [64]. Another study among a sample of adults in USA showed that food insecurity was associated with smoking cigarettes and heavy alcohol use [65].

School going adolescents with three or more close peers were less likely to use substance than those with no friend. Interestingly, the influence of close peers is either positive or negative. It is argued that many cases of behavioural problems and substance use observed in adolescents is associated with similar substance use behaviours in close friends [66]. On the other hand, consistent with our research, close peer relationships discourage substance usage among adolescents [67]. It is possible that adolescents with more close friends participate in gainful extracurricular activities that influences them to avoid using substance. These activities may include sports, community services and volunteering which have been linked to reduced use of illicit drugs [32, 68]. Such levels of participation may lead to additional benefits including positive health outcomes, increase academic performance, improve moods, and tighter bonds [69].

Finally, children who received parental supervision in the past 30 days were less likely to use substances. Within the microsystem, parents are nearest to the child, and the relationship that takes place in the system typically has a significant effect on the child's life. Parents who regularly monitor their children serve as protective agents against the use of substances as parents keep track of their children's peers, whereabouts, and activities [70]. Moreover, children with good parental supervision have a lower susceptibility to peer pressure which might serve as a contributor to substance use [71]. This is because during the developmental phase, parents are very important in the lives of children and they can influence their children's choices at that time to stay away from risky habits such as substance use [72, 73]. Our finding is consistent with that of Tornay et al's [74] who revealed that substance use decreases as parental regulation increases.

## 5 Implications of the study

The findings of this study call for more stringent interventions and health programs directed towards educating parents about the consequences of using illicit drugs in presence of their

children. To curb the use of substances among school-going adolescents in Timor-Leste certain school-based measures must be implemented. Awareness clubs, for instance, should be formed to educate school-going adolescents about the adverse effects of drug use and abuse. Finally, the policies regarding the use of illegal substances in Timor-Leste should be strengthened to reduce the proliferation and adolescents' access of psychoactive drugs.

## 6 Strengths and limitations

Our study used nationally representative sample collected with robust procedures that increase the generalizability and reliability of the results. Some limitations are worth mentioning. Firstly, the data were collected through self-report questionnaire. Although the World Health Organization's current dataset is the 2015 Timor-Leste Global school-based student health survey, future researchers should try to use current datasets done by other agencies because behaviour changes over time and the 2015 dataset does not entirely reflect current behavioural trends. It is also possible that recall bias and deliberate misreporting affected the accuracy of the data. Additionally, since secondary data was primarily used in this study, we had little control over the variables to be included in our analysis. For instance, we could not operationalize and control for other essential components of Bandura's Social Cognitive Theory such as self-efficacy expectation and outcome expectancy. Despite its importance, we could not control for variables based on Ajzen's theory of planned behaviour. Future studies should use other methodologies to exert more control over variable selection and inclusion. Lastly, we only reported correlational findings and not cause-and-effect since the dataset was collected in a cross-sectional manner. It is recommended that future studies should causally examine these variables using longitudinal research designs.

## 7 Conclusion

This study examined the relationship between exposure to substance and current substance usage among school-going adolescents. We found that parental tobacco use and people smoking in the presence of adolescent or second-hand smoking exposure, increases the likelihood of substance use among adolescents. Furthermore, males, adolescents in the upper secondary, those who were food insecure were more likely to be current substance users whilst adolescents with 3 or more friends and who had parental supervision were less likely. Stakeholders in Timor-Leste should consider these factors in optimizing public health interventions against substance use for adolescents.

## Acknowledgments

We appreciate the WHO for making the dataset used in this study publicly and freely available. We are grateful to the Research Empowerment Network (REN) for the training support in data management and academic writing.

## Author Contributions

**Conceptualization:** Kenneth Owusu Ansah, Nutifafa Eugene Yaw Dey, Henry Ofori Duah, Agbadi Pascal.

**Data curation:** Nutifafa Eugene Yaw Dey, Agbadi Pascal.

**Formal analysis:** Kenneth Owusu Ansah, Nutifafa Eugene Yaw Dey.

**Writing – original draft:** Abigail Esinam Adade, Kenneth Owusu Ansah, Nutifafa Eugene Yaw Dey.

**Writing – review & editing:** Francis Arthur-Holmes, Henry Ofori Duah, Agbadi Pascal.

## References

1. Charlson FJ, Baxter AJ, Dua T, Degenhardt L, Whiteford HA, Vos T. Excess mortality from mental, neurological and substance use disorders in the Global Burden of Disease Study 2010. *Epidemiol Psychiatr Sci* 2015; 24:121–40. <https://doi.org/10.1017/S2045796014000687> PMID: 25497332
2. El Kazdoui H, El-Ammari A, Bouftini S, El Fakir S, El Achhab Y. Potential risk and protective factors of substance use among school adolescents in Morocco: A cross-sectional study. *J Subst Use* 2019; 24:176–83. <https://doi.org/10.1080/14659891.2018.1535003>.
3. Vardakou I, Pistos C, Dona A, Spiliopoulou C, Athanaselis S. Naphyrone: A “legal high” not legal any more. *Drug Chem Toxicol* 2012; 35:467–71. <https://doi.org/10.3109/01480545.2011.642381> PMID: 22168347
4. Levy S, Campbell MD, Shea CL, Du Pont R. Trends in abstaining from substance use in adolescents: 1975–2014. *Pediatrics* 2018;142. <https://doi.org/10.1542/peds.2017-3498> PMID: 30026244
5. Report WD. Drugs and age: Drugs and associated issues among young people and older people. 2018.
6. Carvajal F, Lerma-Cabrera JM. Alcohol Consumption Among Adolescents—Implications for Public Health. *Topics in Public Health*; 2015. <https://doi.org/10.5772/58930>.
7. World Health Organization. Global School-based Student Health Survey Results: 2015 –Timor-Leste. New Delhi: 2017.
8. Shaikh MA, Zare Z, Ng KW, Celedonia KL, Wilson ML. Tobacco Use and Parental Monitoring—Observations from Three Diverse Island Nations—Cook Islands,. *Int J Environ Res Public Health* 2020; 17:7360. <https://doi.org/10.3390/ijerph17207360> PMID: 33050181
9. Pengpid S, Peltzer K. Leisure-time sedentary behavior is associated with psychological distress and substance use among school-going adolescents in five southeast Asian countries: A cross-sectional study. *Int J Environ Res Public Health* 2019; 16. <https://doi.org/10.3390/ijerph16122091> PMID: 31200468
10. Pengpid S, Peltzer K. Current cannabis and lifetime amphetamine use among in-school adolescents in five ASEAN countries: socio-ecological perspectives. *Vulnerable Child Youth Stud* 2020; 15:318–28. <https://doi.org/10.1080/17450128.2020.1770391>.
11. Daley DC. Family and social aspects of substance use disorders and treatment. *J Food Drug Anal* 2013; 21:S73–6. <https://doi.org/10.1016/j.jfda.2013.09.038> PMID: 25214748
12. Chen DTH, Millett C, Filippidis FT. Prevalence and determinants of dual and poly-tobacco use among males in 19 low-and middle-income countries: Implications for a comprehensive tobacco control regulation. *Prev Med (Baltim)* 2021; 142:106377. <https://doi.org/10.1016/j.ypmed.2020.106377>.
13. Sahu KK, Sahu S. Substance Abuse Causes and Consequences 2016.
14. Thylstrup B, Clausen T, Hesse M. Cardiovascular disease among people with drug use disorders. *Int J Public Health* 2015; 60:659–68. <https://doi.org/10.1007/s00038-015-0698-3> PMID: 26104131
15. Diraditsile K, Rasesigo K. Substance Abuse and Mental Health Effects among the Youth in Botswana: Implications for Social Research Substance Abuse and Mental Health Effects among the Youth in Botswana: Implications for Social 2018. <https://doi.org/10.9734/JESBS/2018/38304>.
16. Juárez-Portilla C, Molina-Jiménez T, Morin J-P, Roldán-Roldán G, Zepeda RC. Influence of Drugs on Cognitive Functions. *Heal Acad Achiev* 2018. <https://doi.org/10.5772/intechopen.71842>.
17. Curtin SC, Tejada-Vera B, Warner M. Drug Overdose Deaths Among Adolescents Aged 15–19 in the United States: 1999–2015. *NCHS Data Brief* 2017:1–8. PMID: 29155681
18. United Nations Funds for Population Activities. Drug use in Timor-Leste—an assessment. UNFPA, Timor-Leste. 2012.
19. Ribeiro Sarmiento D, Yehadji D. An analysis of global youth tobacco survey for developing a comprehensive national smoking policy in Timor-Leste. *BMC Public Health* 2016; 16:1–7. <https://doi.org/10.1186/s12889-015-2639-8>
20. Gallimberti L, Buja A, Chindamo S, Lion C, Terraneo A, Marini E, et al. Prevalence of substance use and abuse in late childhood and early adolescence: What are the implications? *Prev Med Reports* 2015; 2:862–7. <https://doi.org/10.1016/j.pmedr.2015.09.018> PMID: 26844161
21. Anda RF, Brown DW. Smoking among youth in east Timor-Leste: What are the dynamics? *Indian Pediatr* 2008; 45:961–2. PMID: 19129562
22. Siziya S, Muula AS, Rudatsikira E. Prevalence and correlates of current cigarette smoking among adolescents in east timor-leste. *Smok Adolesc Int Public Heal Exp* 2016:22–231.

23. Bandura A, McClelland DC. Social learning theory. Englewood Cliffs: Prentice Hall; 1977.
24. Ajzen I. Theory of planned behaviour. *Organ Behav Hum Decis Process* 1991; 50:179–211. [https://doi.org/https://doi.org/10.1016/0749-5978\(91\)90020-T](https://doi.org/https://doi.org/10.1016/0749-5978(91)90020-T).
25. Longmore MA, Manning WD, Giordano PC. Parent-child relationships in adolescence. *Handb. Fam. Theor. A content-based approach*, Routledge/Taylor & Francis Group; 2013, p. 28–50.
26. Krohn MD, Loughran TA, Thornberry TP, Jang DW, Freeman-Gallant A, Castro ED. Explaining adolescent drug use in adjacent generations: Testing the generality of theoretical explanations. *J Drug Issues* 2016; 46:373–95. <https://doi.org/10.1177/0022042616659758> PMID: 28042173
27. Lander L, Howsare J, Byrne M. The impact of substance use disorders on families and children: From theory to practice. *Soc Work Public Health* 2013; 28:194–205. <https://doi.org/10.1080/19371918.2013.759005> PMID: 23731414
28. Jeihooni AK, Sorbi A, Harsini PA, Taghinezhad A, Yari A. The application of theory of planned behavior in improving substance abuse prevention behaviors in male high school students. *Curr Psychol* 2021. <https://doi.org/https://doi.org/10.1007/s12144-021-02410-2>.
29. Cservenka A, Herting MM, Seghete KLM, Hudson KA, Nagel BJ. High and low sensation seeking adolescents show distinct patterns of brain activity during reward processing. *Neuroimage* 2013; 66:184–93. <https://doi.org/10.1016/j.neuroimage.2012.11.003> PMID: 23142276
30. Kuhn CM, Wilson W, Swartzwelder S. Enduring Effects of Adolescent Drug Exposure. *Biol Psychiatry* 2013; 74:480–1. <https://doi.org/10.1016/j.biopsych.2013.07.030> PMID: 24034365
31. Mares SHW, van der Vorst H, Engels RCME, Lichtwarck-Aschoff A. Parental alcohol use, alcohol-related problems, and alcohol-specific attitudes, alcohol-specific communication, and adolescent excessive alcohol use and alcohol-related problems: An indirect path model. *Addict Behav* 2011; 36:209–16. <https://doi.org/10.1016/j.addbeh.2010.10.013>.
32. Moilanen KL, Markstrom CA, Jones E. Extracurricular Activity Availability and Participation and Substance Use Among American Indian Adolescents. *J Youth Adolesc* 2014; 43:454–69. <https://doi.org/10.1007/s10964-013-0088-1> PMID: 24435768
33. Oppong Asante K. Cannabis and amphetamine use and its psychosocial correlates among school-going adolescents in Ghana. *Child Adolesc Psychiatry Ment Health* 2019; 13:1–9. <https://doi.org/10.1186/s13034-018-0261-0>
34. Peltzer K, Pengpid S. Cannabis and Amphetamine Use and Socio-Ecological Proximal and Distal Factors Among School-Going Adolescents in Six Pacific Island Countries. *Psychol Stud (Mysore)* 2018; 63:391–7. <https://doi.org/10.1007/s12646-018-0468-4>.
35. West BT, Sakshaug JW, Aurelien GAS. How big of a problem is analytic error in secondary analyses of survey data? *PLoS One* 2016; 11:1–29. <https://doi.org/10.1371/journal.pone.0158120> PMID: 27355817
36. Rabie M, Shaker NM, Gaber E, El-Habiby M, Ismail D, El-Gaafary M, et al. Prevalence updates of substance use among Egyptian adolescents. *Middle East Curr Psychiatry* 2020; 27. <https://doi.org/10.1186/s43045-019-0013-8>.
37. Schuck K, Otten R, Engels RCME, Kleinjan M. The role of environmental smoking in smoking-related cognitions and susceptibility to smoking in never-smoking 9–12-year-old children. *Addict Behav* 2012; 37:1400–5. <https://doi.org/10.1016/j.addbeh.2012.06.019> PMID: 22784393
38. Jallow IK, Britton J, Langley T. Prevalence and determinants of tobacco use among young people in the Gambia. *BMJ Glob Heal* 2017; 2:1–9. <https://doi.org/10.1136/bmjgh-2017-000482> PMID: 29333286
39. Xi B, Liang Y, Liu Y, Yan Y, Zhao M, Ma C, et al. Tobacco use and second-hand smoke exposure in young adolescents aged 12–15 years: data from 68 low-income and middle-income countries. *Lancet Glob Heal* 2016; 4:e795–805. [https://doi.org/10.1016/S2214-109X\(16\)30187-5](https://doi.org/10.1016/S2214-109X(16)30187-5) PMID: 27697484
40. Bektas M, Ozturk C, Armstrong M. An approach to children's smoking behaviours using social cognitive learning theory. *Asian Pacific J Cancer Prev* 2010; 11:1143–9. PMID: 21133639
41. Leonardi-Bee J, Jere ML, Britton J. Exposure to parental and sibling smoking and the risk of smoking uptake in childhood and adolescence: A systematic review and meta-analysis. *Thorax* 2011; 66:847–55. <https://doi.org/10.1136/thx.2010.153379> PMID: 21325144
42. Okoli CTC, Kodet J. A systematic review of secondhand tobacco smoke exposure and smoking behaviors: Smoking status, susceptibility, initiation, dependence, and cessation. *Addict Behav* 2015; 47:22–32. <https://doi.org/10.1016/j.addbeh.2015.03.018> PMID: 25863004
43. Jawad M, Nakkash RT, Mahfoud Z, Bteddini D, Haddad P, Afifi RA. Parental smoking and exposure to environmental tobacco smoke are associated with waterpipe smoking among youth: Results from a national survey in Lebanon. *Public Health* 2015; 129:370–6. <https://doi.org/10.1016/j.puhe.2015.01.011> PMID: 25749674



44. Mays D, Gilman SE, Rende R, Luta G, Tercyak KP, Niaura RS. Parental smoking exposure and adolescent smoking trajectories. *Pediatrics* 2014; 133:983–91. <https://doi.org/10.1542/peds.2013-3003> PMID: 24819567
45. Vuolo M, Staff J. Parent and child cigarette use: A longitudinal, multigenerational study. *Pediatrics* 2013;132. <https://doi.org/10.1542/peds.2013-0067>.
46. Balfour J. The role of mesoaccumbens dopamine in nicotine dependence. *Neuropharmacol Nicotine Depend* 2015; 24:55–98. [https://doi.org/10.1007/978-3-319-13482-6\\_3](https://doi.org/10.1007/978-3-319-13482-6_3) PMID: 25638334
47. Bird Y, Staines-Orozco H, Moraros J. Adolescents' smoking experiences, family structure, parental smoking and socio-economic status in Ciudad Juárez, Mexico. *Int J Equity Health* 2016; 15:1–9. <https://doi.org/10.1186/s12939-015-0290-8>
48. Mchugh KR, Votaw VR, Sugarman DE, F GS. Sex and Gender Differences in Substance Use Disorders. *Clin Psychol Rev* 2018; 66:12–23. <https://doi.org/10.1016/j.cpr.2017.10.012> PMID: 29174306
49. Hemsing N, Greaves L. Gender Norms, Roles and Relations and Cannabis-Use Patterns: A Scoping Review. *Int J Environ Res Public Health* 2020; 17. <https://doi.org/10.3390/ijerph17030947> PMID: 32033010
50. Augustyn MB, McGloin JM. The Risk of Informal Socializing with Peers: Considering Gender Differences Across Predatory Delinquency and Substance Use. *Justice Q* 2013; 30:117–43. <https://doi.org/10.1080/07418825.2011.597417>.
51. Kuhn C. Emergence of sex differences in the development of substance use and abuse during adolescence. *Pharmacol Ther* 2015; 153:55–78. <https://doi.org/10.1016/j.pharmthera.2015.06.003> PMID: 26049025
52. Zarrouq B, Bendaou B, El Asri A, Achour S, Rammouz I, Aalouane R, et al. Psychoactive substances use and associated factors among middle and high school students in the North Center of Morocco: A cross-sectional questionnaire survey. *BMC Public Health* 2016; 16:1–9. <https://doi.org/10.1186/s12889-016-3143-5>
53. Hong SA, Peltzer K. Early Adolescent Patterns of Alcohol and Tobacco Use in Eight Association of South-East Asian Nations (ASEAN) Member States. *Subst Use Misuse* 2019; 54:288–96. <https://doi.org/10.1080/10826084.2018.1517797> PMID: 30463459
54. Lev-Ran S, Le Strat Y, Imtiaz S, Rehm J, Le Foll B. Gender differences in prevalence of substance use disorders among individuals with lifetime exposure to substances: Results from a large representative sample. *Am J Addict* 2013; 22:7–13. <https://doi.org/10.1111/j.1521-0391.2013.00321.x> PMID: 23398220
55. Leonard NR, Gwadz M V., Ritchie A, Linick JL, Cleland CM, Elliott L, et al. A multi-method exploratory study of stress, coping, and substance use among high school youth in private schools. *Front Psychol* 2015; 6:1–16. <https://doi.org/10.3389/fpsyg.2015.01028>
56. Sun J, Dunne MP, Hou X yu, Xu A qiang. Educational stress among Chinese adolescents: individual, family, school and peer influences. *Educ Rev* 2013; 65:284–302. <https://doi.org/10.1080/00131911.2012.659657>.
57. Rosenqvist E. Two Functions of Peer Influence on Upper-secondary Education Application Behavior. *Sociol Educ* 2018; 91:72–89. <https://doi.org/10.1177/0038040717746113>.
58. Henneberger AK, Mushonga DR, Preston AM. Peer Influence and Adolescent Substance Use: A Systematic Review of Dynamic Social Network Research. *Adolesc Res Rev* 2021; 6:57–73. <https://doi.org/10.1007/s40894-019-00130-0>.
59. Khan MMA, Rahman MM, Jeamin SS, Mustagir MG, Haque MR, Kaikobad MS. Psychosocial and socio-environmental factors associated with adolescents' tobacco and other substance use in Bangladesh. *PLoS One* 2020; 15:1–17. <https://doi.org/10.1371/journal.pone.0242872> PMID: 33232381
60. Tee GH, Kaur G. Correlates of current smoking among Malaysian secondary school children. *Asia Pac J Public Health* 2014; 26. <https://doi.org/10.1177/1010539514540468> PMID: 24965781
61. Nagata JM, Palar K, Gooding HC, Garber AK, Tabler JL, Whittle HJ, et al. Food Insecurity, Sexual Risk, and Substance Use in Young Adults. *J Adolesc Heal* 2021; 68:169–77. <https://doi.org/10.1016/j.jadohealth.2020.05.038>.
62. Integrated Food Security Phase Classification. The First IPC Analysis Report on the Chronic Food Insecurity Situation in Timor-Leste. Evidence and Standards for Better Food Security and Nutrition Decisions 2019: 22.
63. Embleton L, Atwoli L, Ayuku D, Braitstein P. The Journey of Addiction: Barriers to and Facilitators of Drug Use Cessation among Street Children and Youths in Western Kenya. *PLoS One* 2013;8. <https://doi.org/10.1371/journal.pone.0053435>.



64. Baer TE, H MP, Scherer EA, Ph D, Fleegler EW, H MP, et al. Food Insecurity and the Burden of Health-Related Social Problems in an Urban Youth Population. *J Adolesc Heal* 2015; 57:601–7. <https://doi.org/10.1016/j.jadohealth.2015.08.013>.
65. Bergmans RS, Coughlin L, Wilson T, Malecki K. Cross-sectional associations of food insecurity with smoking cigarettes and heavy alcohol use in a population-based sample of adults. *Drug Alcohol Depend* 2019; 205. <https://doi.org/10.1016/j.drugalcdep.2019.107646>. Cross-sectional.
66. Schuler MS, Tucker JS, Pedersen ER, D'Amico EJ. Relative influence of perceived peer and family substance use on adolescent alcohol, cigarette, and marijuana use across middle and high school. *Addict Behav* 2019; 88:99–105. <https://doi.org/10.1016/j.addbeh.2018.08.025> PMID: 30173075
67. Jorge KO, Ferreira RC, e Ferreira EF, Kawachi I, Zarzar PM, Pordeus IA. Influência do grupo de pares e uso de drogas ilícitas entre adolescentes Brasileiros: Um estudo transversal. *Cad Saude Publica* 2018; 34. <https://doi.org/10.1590/0102-311X00144316>.
68. Kwan M, Bobko S, Faulkner G, Donnelly P, Cairney J. Sport participation and alcohol and illicit drug use in adolescents and young adults: A systematic review of longitudinal studies. *Addict Behav* 2014; 39:497–506. <https://doi.org/10.1016/j.addbeh.2013.11.006> PMID: 24290876
69. Eime RM, Young JA, Harvey JT, Charity MJ, Payne WR. A systematic review of the psychological and social benefits of participation in sport for adults: Informing development of a conceptual model of health through sport. *Int J Behav Nutr Phys Act* 2013; 10. <https://doi.org/10.1186/1479-5868-10-135> PMID: 24313992
70. Kaynak Ö, Meyers K, Caldeira KM, Vincent KB, Winters KC, Arria AM. Relationships among parental monitoring and sensation seeking on the development of substance use disorder among college students. *Addict Behav* 2013; 38:1457–63. <https://doi.org/10.1016/j.addbeh.2012.08.003> PMID: 23017733
71. Clark HK, Shamblen SR, Ringwalt CL, Hanley S. Predicting high risk adolescents' substance use over time: The role of parental monitoring. *J Prim Prev* 2012; 33:67–77. <https://doi.org/10.1007/s10935-012-0266-z> PMID: 22370765
72. Luk JW, Farhat T, Iannotti RJ, Simons-Morton BG. Parent-child communication and substance use among adolescents: Do father and mother communication play a different role for sons and daughters? *Addict Behav* 2010; 35:426–31. <https://doi.org/10.1016/j.addbeh.2009.12.009> PMID: 20060651
73. Mak HW, Iacovou M. Dimensions of the Parent–Child Relationship: Effects on Substance Use in Adolescence and Adulthood. *Subst Use Misuse* 2019; 54:724–36. <https://doi.org/10.1080/10826084.2018.1536718> PMID: 30457893
74. Tornay L, Michaud PA, Gmel G, Wilson ML, Berchtold A, Suris JC. Parental monitoring: A way to decrease substance use among Swiss adolescents? *Eur J Pediatr* 2013; 172:1229–34. <https://doi.org/10.1007/s00431-013-2029-0> PMID: 23661237
